# Supplementary material for: Genomic Comparison of Non-Typhoidal Salmonella enterica Serovars Typhimurium, Enteritidis, Heidelberg, Hadar and Kentucky Isolates from Broiler Chickens
Source: PubMed Central journal article supplement (PMC4470630; doi:10.1371/journal.pone.0128773), 2015-06-17

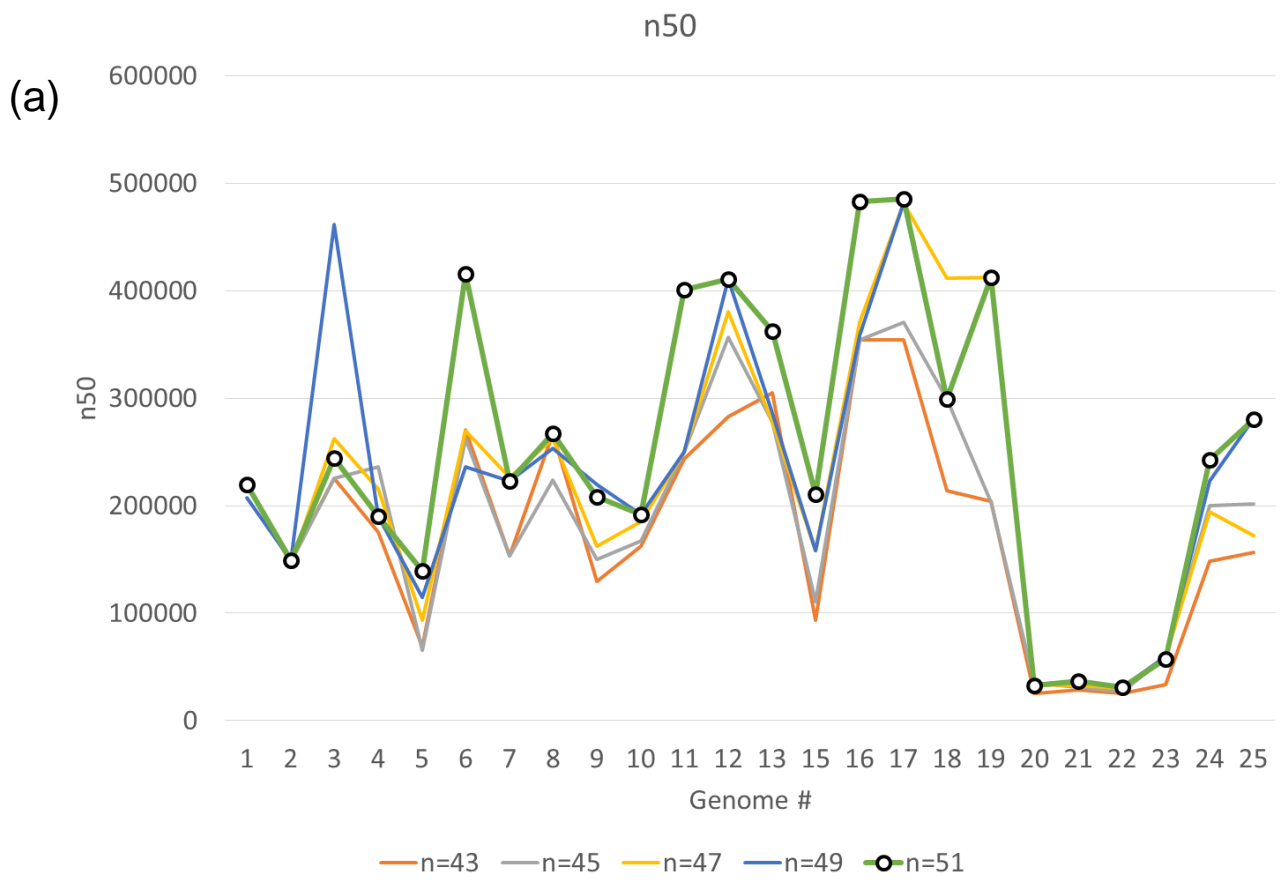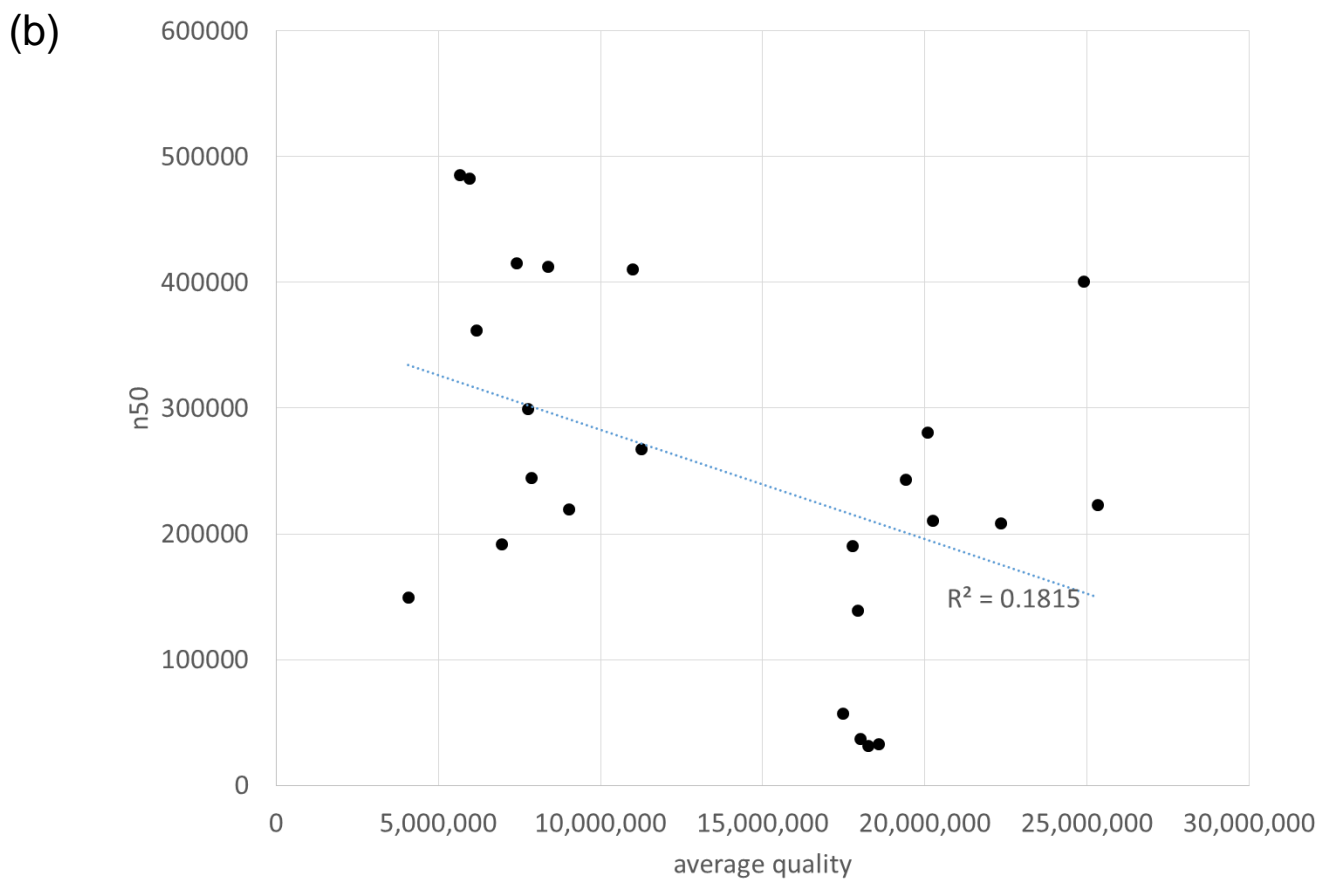

Supplement: pone.0128773.s001.pdf [file pone.0128773.s001.pdf]
